# Supplementary material for: Investigation of encapsulation of insulin biotemplate within C-methylresorcin[4]arenes
Source: Royal Society of Chemistry journal article supplement (doi:10.1039/c2cc18071e), 2012-01-01
Supplement: c2cc18071e.pdf [file c2cc18071e.pdf]

## Supporting Information

### Investigation of encapsulation of insulin biotemplate within C-methylresorcin[4]arenes

Harshita Kumari,<sup>a</sup> Steven R. Kline,<sup>b</sup> and Jerry L. Atwood\*<sup>a</sup>

<sup>a</sup>Department of Chemistry, University of Missouri-Columbia, 601 S. College Avenue, Columbia, MO 65211, USA.

<sup>b</sup>NIST Center for Neutron Research, Gaithersburg, MD, 20899-6102, USA. <sup>c</sup>Materials Measurement Laboratory, National Institute of Standards and Technology, Gaithersburg, MD

In this section of supporting information, we report the buffer composition of insulin, BCA analysis of insulin, scattering length densities, full sets of fitting parameters of the Schulz sphere fits and bimodal Schulz sphere fits for insulin, C-methylresorcin[4]arene (RsC<sub>1</sub>) and insulin with RsC<sub>1</sub> in D<sub>2</sub>O/h6-acetone, D<sub>2</sub>O/d6-acetone and D<sub>2</sub>O/h6-acetone/d6-acetone solvent systems. Fitted values are compared in a tabulated result summary. All uncertainties reported are one standard deviation of that fitted parameter. Please find below the list of tables and data sets with corresponding explanations.

#### **INSULIN COMPOSITIONS AND DIALYSIS:**

The concentration of humalog insulin was estimated to be around 10 mg/ml from the spectroscopic bicinchoninic acid (BCA) protein assay (supporting information). Humalog insulin (A chain 21; B chain 30 amino acids; Mol Wt: 5808 Da) is essentially a human insulin analogue formed by interchanging the amino acids position 28 (Pro) and position 29 (Lys) on the B-chain of insulin. LYSPRO or humalog insulin, obtained commercially, was dialyzed in D<sub>2</sub>O buffer to obtain improved scattering statistics in deuterated solvent.

#### **Buffer composition for dialysis experiment:**

Buffer composition/100 ml of D<sub>2</sub>O: 16 mg glycerin, 1.88 mg dibasic sodium phosphate, 3.15 mg metacresol, zinc oxide content adjusted to provide 0.0197 mg zinc ion, trace amounts of phenol and pH adjusted to 7.0 to 7.8.

#### **SOLVENT COMPOSITIONS:**

Solvents systems were composed of (1) 4 equiv. of D<sub>2</sub>O with 1 equiv. of h6-acetone ( $3.7 \times 10^{-6} \text{ \AA}^{-2}$ ), (2) 4 equiv. of D<sub>2</sub>O with 1 equiv. of d6-acetone (SLD =  $6.3 \times 10^{-6} \text{ \AA}^{-2}$ ), and (3) 4 equiv. of D<sub>2</sub>O with 0.5 equiv. of d6-acetone and 0.5 equiv. of h6-acetone ( $5.0 \times 10^{-6} \text{ \AA}^{-2}$ ).

#### LIST OF TABLES

|                                                                                                    |   |
|----------------------------------------------------------------------------------------------------|---|
| Table 1. BCA Protein Assay for Humalog insulin.....                                                | 3 |
| Table 2. Scattering length densities (SLD) .....                                                   | 4 |
| Table 3. SANS Result Summary of Insulin and C-methylresorcin[4]arene templation experiment 2 ..... | 5 |

#### LIST OF FIGURES

|                                                                                                                                                                                                                            |    |
|----------------------------------------------------------------------------------------------------------------------------------------------------------------------------------------------------------------------------|----|
| Figure 1. Contrast variation: (left) Natural contrast; (middle) the SLD of solvent is equal to that of solvent that makes shell visible; (right) the SLD of shell is equal to that of solvent that makes core visible..... | 4  |
| Figure 2. SANS Smear bimodal Schulz sphere fitting for $RsC_1$ in a solvent with SLD of $3.7 \times 10^{-6} \text{ \AA}^{-2}$ ...                                                                                          | 6  |
| Figure 3. SANS Smear Schulz sphere fitting for $RsC_1$ in a solvent with SLD of $3.7 \times 10^{-6} \text{ \AA}^{-2}$ .....                                                                                                | 7  |
| Figure 4. SANS Smear Schulz sphere fitting for $RsC_1$ in a solvent with SLD of $6.3 \times 10^{-6} \text{ \AA}^{-2}$ .....                                                                                                | 8  |
| Figure 5. SANS Smear bimodal Schulz sphere fitting for $RsC_1$ in a solvent with SLD of $6.3 \times 10^{-6} \text{ \AA}^{-2}$ ..                                                                                           | 9  |
| Figure 6. SANS Smear bimodal Schulz sphere fitting for $RsC_1$ in a solvent with SLD of $5.0 \times 10^{-6} \text{ \AA}^{-2}$ ..                                                                                           | 10 |
| Figure 7. SANS Smear Schulz sphere fitting for $RsC_1$ in a solvent with SLD of $5.0 \times 10^{-6} \text{ \AA}^{-2}$ .....                                                                                                | 11 |
| Figure 8. SANS Smear Schulz sphere fitting for solvent with SLD of $3.7 \times 10^{-6} \text{ \AA}^{-2}$ .....                                                                                                             | 12 |
| Figure 9. SANS Smear Schulz sphere fitting for solvent with SLD of $6.3 \times 10^{-6} \text{ \AA}^{-2}$ .....                                                                                                             | 13 |
| Figure 10. SANS Smear Schulz sphere fitting for solvent with SLD of $5.0 \times 10^{-6} \text{ \AA}^{-2}$ .....                                                                                                            | 14 |
| Figure 11. SANS Smear bimodal Schulz sphere fitting for insulin in a solvent with SLD of $6.3 \times 10^{-6} \text{ \AA}^{-2}$ .....                                                                                       | 15 |
| Figure 12. SANS Smear bimodal Schulz sphere fitting for insulin in a solvent with SLD of $5.0 \times 10^{-6} \text{ \AA}^{-2}$ .....                                                                                       | 16 |
| Figure 13. SANS Smear bimodal Schulz sphere fitting for insulin in a solvent with SLD of $3.7 \times 10^{-6} \text{ \AA}^{-2}$ .....                                                                                       | 17 |
| Figure 14. SANS Smear bimodal Schulz sphere fitting for $RsC_1$ with insulin in a solvent with SLD of $3.7 \times 10^{-6} \text{ \AA}^{-2}$ .....                                                                          | 18 |
| Figure 15. SANS Smear bimodal Schulz sphere fitting for $RsC_1$ with insulin in a solvent with SLD of $6.3 \times 10^{-6} \text{ \AA}^{-2}$ .....                                                                          | 19 |
| Figure 16. SANS Smear bimodal Schulz sphere fitting for $RsC_1$ with insulin in a solvent with SLD of $5.0 \times 10^{-6} \text{ \AA}^{-2}$ .....                                                                          | 20 |

**Table 1. BCA Protein Assay for Humalog insulin**

| Conc.<br>( $\mu\text{g/ml}$ )      | Absorbance | $\mu\text{g/ml}$ | mg/ml    | 1:20 dilution | $\mu\text{g/ml}$ | mg/ml    | 1:100 dilution | $\mu\text{g/ml}$ | mg/ml    |
|------------------------------------|------------|------------------|----------|---------------|------------------|----------|----------------|------------------|----------|
| 0                                  | 0.107      |                  |          |               |                  |          |                |                  |          |
| 25                                 | 0.145      |                  |          |               |                  |          |                |                  |          |
| 125                                | 0.314      |                  |          |               |                  |          |                |                  |          |
| 250                                | 0.491      |                  |          |               |                  |          |                |                  |          |
| 500                                | 0.815      |                  |          |               |                  |          |                |                  |          |
| 750                                | 1.032      |                  |          |               |                  |          |                |                  |          |
| 1000                               | 1.389      |                  |          |               |                  |          |                |                  |          |
| 1500                               | 1.766      |                  |          |               |                  |          |                |                  |          |
| 2000                               | 2.394      |                  |          |               |                  |          |                |                  |          |
|                                    |            |                  |          |               |                  |          |                |                  |          |
| Insulin:H <sub>2</sub> O DILUTIONS |            |                  |          |               |                  |          |                |                  |          |
| 1:10 dilution                      |            | $\mu\text{g/ml}$ | mg/ml    | 1:20 dilution | $\mu\text{g/ml}$ | mg/ml    | 1:100 dilution | $\mu\text{g/ml}$ | mg/ml    |
| 1.193                              | 924.1818   | 924.1818         | 9.241818 | 0.744         | 516              | 10.32    | 0.278          | 92.36364         | 9.236364 |
| 1.281                              | 1004.182   | 1004.182         | 10.04182 | 0.746         | 517.8182         | 10.35636 | 0.274          | 88.72727         | 8.872727 |
| 1.223                              | 951.4545   | 951.4545         | 9.514545 | 0.747         | 518.7273         | 10.37455 | 0.308          | 119.6364         | 11.96364 |
| Insulin:<br>buffer                 |            | 9.599394         | 9.599394 |               |                  | 10.3503  |                |                  | 10.02424 |
| 1:10 dilution                      |            | $\mu\text{g/ml}$ | mg/ml    | 1:20 dilution | $\mu\text{g/ml}$ | mg/ml    | 1:100 dilution | $\mu\text{g/ml}$ | mg/ml    |
| 1.347                              | 1064.182   | 1064.182         | 10.64182 | 0.828         | 592.3636         | 11.84727 | 0.288          | 101.4545         | 10.14545 |
| 1.395                              | 1107.818   | 1107.818         | 11.07818 | 0.833         | 596.9091         | 11.93818 | 0.308          | 119.6364         | 11.96364 |
| 1.234                              | 961.4545   | 961.4545         | 9.614545 | 0.863         | 624.1818         | 12.48364 | 0.303          | 115.0909         | 11.50909 |
|                                    | 10.44485   | 10.44485         | 10.44485 |               |                  | 12.0897  |                |                  | 11.20606 |

Average concentration of humalog insulin in mg/ml= 10.61909

**NOTE: BCA (bicinchoninic acid) protein assay of insulin of humalog insulin gave 10.6 mg/ml concentration of insulin.**

## Supporting information: Small-angle neutron scattering (SANS)

Contrast Variation Method:

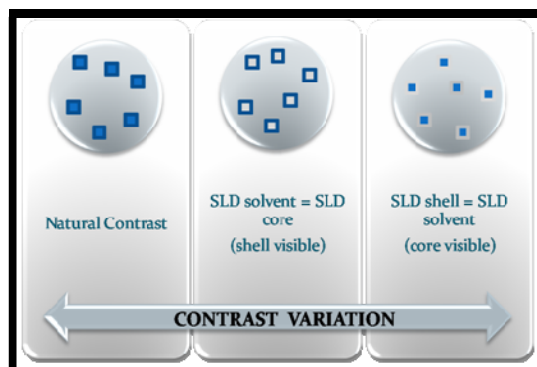

**Figure 1.** Contrast variation: (left) Natural contrast; (middle) the SLD of solvent is equal to that of solvent that makes shell visible; (right) the SLD of shell is equal to that of solvent that makes core visible

**Table 2. Scattering length densities (SLD)**

| S.No. | SAMPLE                                        | Formula                                                                                                                                                                                                                                 | Density (g/ml) | $\lambda$ (Å) | SLD (Å <sup>-2</sup> ) |
|-------|-----------------------------------------------|-----------------------------------------------------------------------------------------------------------------------------------------------------------------------------------------------------------------------------------------|----------------|---------------|------------------------|
| 1     | 4 D <sub>2</sub> O : 1 d-acetone              | D <sub>8</sub> O <sub>4</sub> C <sub>3</sub> D <sub>6</sub> O                                                                                                                                                                           | 1.06           | 6             | 6.3x10 <sup>-6</sup>   |
| 2     | 4 D <sub>2</sub> O : 1 h-acetone              | D <sub>8</sub> O <sub>4</sub> C <sub>3</sub> D <sub>6</sub> O                                                                                                                                                                           | 1.06           | 6             | 3.7x10 <sup>-6</sup>   |
| 3     | 4 D <sub>2</sub> O : 1 d-acetone: 1 h-acetone | D <sub>8</sub> O <sub>4</sub> C <sub>3</sub> D <sub>6</sub> O C <sub>3</sub> H <sub>6</sub> O                                                                                                                                           | 1.06           | 6             | 5.0x10 <sup>-6</sup>   |
| 4     | RSC <sub>1</sub> Hexamer                      | C <sub>240</sub> H <sub>240</sub> O <sub>48</sub>                                                                                                                                                                                       | 1.4            | 6             | 2.11x10 <sup>-6</sup>  |
| 5     | Insulin Monomer                               | C <sub>257</sub> H <sub>383</sub> N <sub>65</sub> O <sub>77</sub> S <sub>6</sub>                                                                                                                                                        | 1.105          | 6             | 1.54 x10 <sup>-6</sup> |
| 6     | Insulin Dimer                                 | (C <sub>257</sub> H <sub>383</sub> N <sub>65</sub> O <sub>77</sub> S <sub>6</sub> )*2                                                                                                                                                   | 1.105          | 6             | 1.54 x10 <sup>-6</sup> |
| 7     | Insulin Hexamer                               | (C <sub>257</sub> H <sub>383</sub> N <sub>65</sub> O <sub>77</sub> S <sub>6</sub> )*6                                                                                                                                                   | 1.105          | 6             | 1.54 x10 <sup>-6</sup> |
| 8     | RSC <sub>1</sub> octamer+Insulin Monomer      | (C <sub>40</sub> H <sub>40</sub> O <sub>8</sub> ) <sub>8</sub> +C <sub>257</sub> H <sub>383</sub> N <sub>65</sub> O <sub>77</sub> S <sub>6</sub> = C <sub>577</sub> H <sub>703</sub> N <sub>65</sub> O <sub>141</sub> S <sub>6</sub>    | 1.4            | 6             | 2.03x10 <sup>-6</sup>  |
| 9     | 24 RSC <sub>1</sub> +Insulin Monomer          | (C <sub>40</sub> H <sub>40</sub> O <sub>8</sub> ) <sub>24</sub> +C <sub>257</sub> H <sub>383</sub> N <sub>65</sub> O <sub>77</sub> S <sub>6</sub> = C <sub>1217</sub> H <sub>1343</sub> N <sub>65</sub> O <sub>269</sub> S <sub>6</sub> | 1.4            | 6             | 2.08 x10 <sup>-6</sup> |

**NOTE:** The scattering length densities of the three solvent systems (S.No. 1-3), macrocycle (S.No. 4), insulin (S. No. 5-7) and macrocycle with insulin (S. No. 8-9) have been calculated. These scattering length densities are used for data analyses of small-angle neutron scattering data curves. The scattering length densities for insulin monomer, dimer and hexamer do not change with change in molecular mass.

### EXPERIMENT DETAILS:

Two sets of experiments were prepared to investigate the reproducibility of results. For the experiment 1, the scattering data for the RsC<sub>1</sub> is fitted to Schulz sphere while that of Insulin and Insulin with RsC<sub>1</sub> is fitted to bimodal Schulz sphere model. For experiment 2, insulin and insulin with RsC<sub>1</sub> samples are fitted to bimodal Schulz sphere model. RsC<sub>1</sub> scattering data is fitted to both bimodal Schulz sphere and Schulz sphere model to investigate the presence of any larger species. The following section has a table summarizing the experimental samples followed by individual data sets fitted to either Schulz sphere or bimodal Schulz sphere models.

### EXPERIMENT

**Table 3. SANS Result Summary of Insulin and C-methylresorcin[4]arene templation experiment**

| EXPERIMENT SET 2             |                                |        |        |                    |                           |                           |                       |
|------------------------------|--------------------------------|--------|--------|--------------------|---------------------------|---------------------------|-----------------------|
| Sample Code                  | SLD Solvent (Å <sup>-2</sup> ) | R1 (Å) | R2 (Å) | Sqrt( $\chi^2/N$ ) | SLD R1 (Å <sup>-2</sup> ) | SLD R2 (Å <sup>-2</sup> ) | MODEL                 |
| A =RsC <sub>1</sub>          | 3.70E-06                       | 6.9    | 10.1   | 3.63               | 2.11E-06                  | 2.11E-06                  | Bimodal Schulz Sphere |
| A =RsC <sub>1</sub>          | 3.70E-06                       | 7.0    |        | 7.60               | 2.11E-06                  |                           | Schulz Sphere         |
| B = RsC <sub>1</sub>         | 6.30E-06                       | 8.5    |        | 2.03               | 2.11E-06                  |                           | Schulz Sphere         |
| B = RsC <sub>1</sub>         | 6.30E-06                       | 7.2    | 10.2   | 1.55               | 2.11E-06                  | 2.11E-06                  | Bimodal Schulz Sphere |
| C = RsC <sub>1</sub>         | 5.00E-06                       | 7.0    | 10.0   | 2.84               | 2.11E-06                  | 2.11E-06                  | Bimodal Schulz Sphere |
| C = RsC <sub>1</sub>         | 5.00E-06                       | 7.3    |        | 4.27               | 2.11E-06                  |                           | Schulz Sphere         |
| L= D <sub>2</sub> O hAc      | 3.70E-06                       | 6.4    |        | 2.09               | 2.11E-06                  |                           | Schulz Sphere         |
| K= D <sub>2</sub> O dAc      | 6.30E-06                       | 7.0    |        | 1.18               | 2.11E-06                  |                           | Schulz Sphere         |
| M= D <sub>2</sub> O hdAc     | 5.00E-06                       | 5.9    |        | 1.41               | 2.11E-06                  |                           | Schulz Sphere         |
| E = Insulin                  | 6.30E-06                       | 10.7   | 25     | 2.99               | 1.54E-06                  | 1.54E-06                  | Bimodal Schulz Sphere |
| E2 = Insulin                 | 5.00E-06                       | 10.1   | 28     | 1.48               | 1.54E-06                  | 1.54E-06                  | Bimodal Schulz Sphere |
| E3 = Insulin                 | 3.70E-06                       | 10.9   | 25     | 2.18               | 1.54E-06                  | 1.54E-06                  | Bimodal Schulz Sphere |
| G= RsC <sub>1</sub> +Insulin | 3.70E-06                       | 7.0    | 16.3   | 1.62               | 2.11E-06                  | 2.03E-06                  | Bimodal Schulz Sphere |
| H= RsC <sub>1</sub> +Insulin | 6.30E-06                       | 6.8    | 16.4   | 1.89               | 2.11E-06                  | 2.03E-06                  | Bimodal Schulz Sphere |
| J= RsC <sub>1</sub> +Insulin | 5.00E-06                       | 7.0    | 16.5   | 1.43               | 2.11E-06                  | 2.03E-06                  | Bimodal Schulz Sphere |

**NOTE:** The results reveal the radius of ~7Å and ~10Å for RsC<sub>1</sub> that corresponds to a dimer and a hexamer respectively. The insulin sample fits to bimodal Schulz sphere model and yields radius of ~10Å & ~24Å that corresponds to an insulin monomer and an insulin trimer. RsC<sub>1</sub> with insulin samples reveals presence of two species of radius ~10 Å and ~16.5 Å. For RsC<sub>1</sub> with insulin sample, the 10Å species corresponds to the radius of either an insulin monomer or RsC<sub>1</sub> hexamer while ~16 Å species corresponds to insulin templated with RsC<sub>1</sub> macrocycle.

### 1) Bimodal Schulz sphere fit results for ReC<sub>1</sub> in D<sub>2</sub>O/h6-acetone solvent

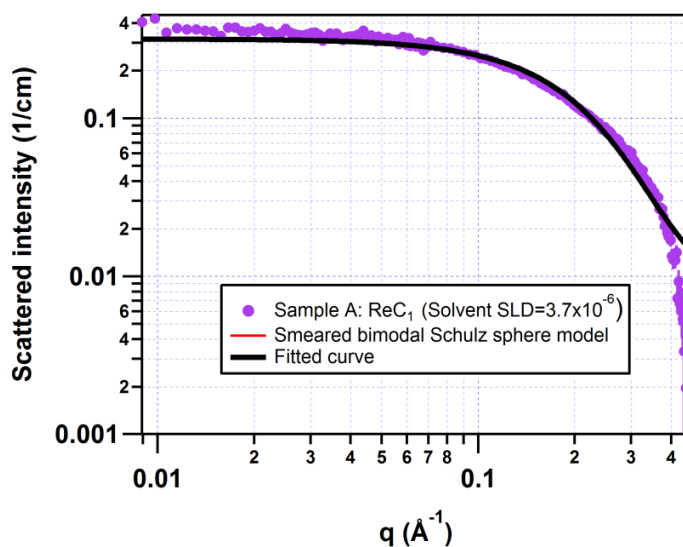

Figure 2. SANS Smeared bimodal Schulz sphere fitting for RsC<sub>1</sub> in a solvent with SLD of  $3.7 \times 10^{-6} \text{ \AA}^{-2}$

|                                                 |            |   |             |
|-------------------------------------------------|------------|---|-------------|
| volume fraction(1)                              | 0.224834   | ± | 0.00361554  |
| Radius (1) (Å)                                  | 6.91071±   |   | 0.00322399  |
| polydispersity(1)                               | 0.200847   | ± | 8.40673e-05 |
| SLD(1) (Å <sup>-2</sup> )                       | 2.11e-06   | ± | 0           |
| volume fraction(2)                              | 0.110196   | ± | 0.00128328  |
| Radius (2)                                      | 10.1481±   |   | 0.0104009   |
| polydispersity(2)                               | 0.198482   | ± | 0.000216823 |
| SLD(2)                                          | 2.11e-06   | ± | 0           |
| SLD (solvent)                                   | 3.7e-06 ±  |   | 0           |
| background (cm <sup>-1</sup> sr <sup>-1</sup> ) | 0.00906032 | ± | 0.00039851  |

chisq = 2485.75

Npnts = 188

Sqrt( $\chi^2/N$ ) = 3.63622

Fitted range = [0,187] =  $0.008936 < Q < 0.4578$

**NOTE:** The SANS data for RsC<sub>1</sub> for D<sub>2</sub>O with h6-acetone (SLD  $3.7 \times 10^{-6} \text{ \AA}^{-2}$ ) fits well to the bimodal Schulz sphere model with  $\chi^2 = 3.6$ . The  $\chi^2$  value is reasonable with small error bars on the parameters and gives a reasonable representation of the data.

## 2) Schulz sphere fit results for RsC<sub>1</sub> in D<sub>2</sub>O/h6-acetone solvent

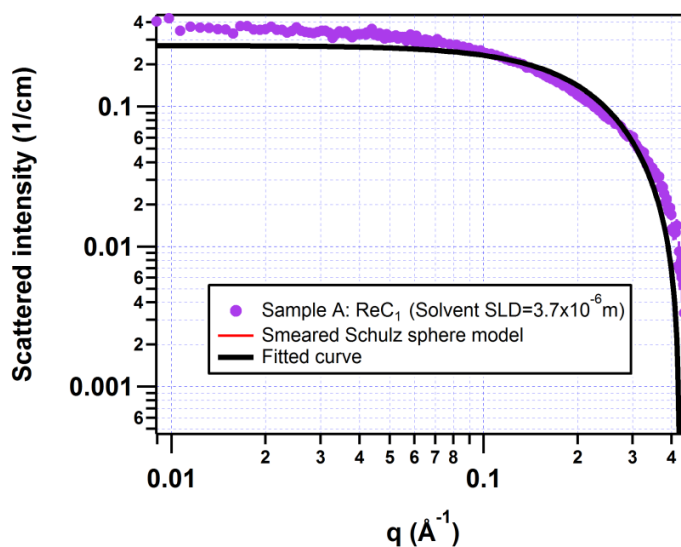

Figure 3. SANS Smearred Schulz sphere fitting for RsC<sub>1</sub> in a solvent with SLD of  $3.7 \times 10^{-6} \text{ \AA}^{-2}$

|                                          |            |   |             |
|------------------------------------------|------------|---|-------------|
| Volume Fraction (scale)                  | 0.520961   | ± | 0.00103244  |
| mean radius (Å)                          | 7.03388    | ± | 0.00108475  |
| polydisp (sig/avg)                       | 0.194957   | ± | 1.73937e-05 |
| SLD sphere (Å <sup>-2</sup> )            | 2.11e-06   | ± | 0           |
| SLD solvent (Å <sup>-2</sup> )           | 3.7e-06    | ± | 0           |
| bkg (cm <sup>-1</sup> sr <sup>-1</sup> ) | -0.0162878 | ± | 0.000270899 |

chisq = 10865.5

Npnts = 188

Sqrt( $\chi^2/N$ ) = 7.60233

Fitted range = [0,187] =  $0.008936 < Q < 0.4578$

**NOTE:** The SANS data for RsC<sub>1</sub> in D<sub>2</sub>O with h6-acetone (SLD  $3.7 \times 10^{-6} \text{ \AA}^{-2}$ ) fits poor to the Schulz sphere model with  $\chi^2 = 7.6$ . The  $\chi^2$  value is high and visually the model does not give a good representation of the data.

### 3) Schulz sphere fit results for RsC<sub>1</sub> in D<sub>2</sub>O/d6-acetone solvent

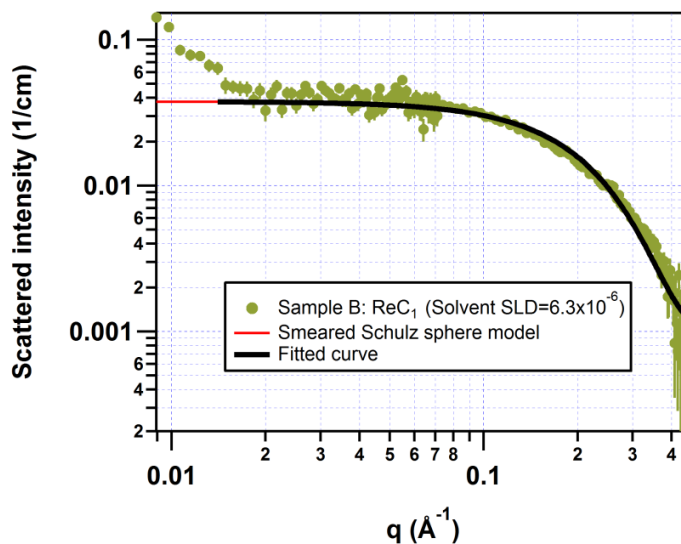

Figure 4. SANS Smeared Schulz sphere fitting for RsC<sub>1</sub> in a solvent with SLD of  $6.3 \times 10^{-6} \text{ \AA}^{-2}$

|                                          |             |   |             |
|------------------------------------------|-------------|---|-------------|
| Volume Fraction (scale)                  | 0.00540242  | ± | 3.66138e-05 |
| mean radius ( $\text{\AA}$ )             | 8.49774     | ± | 0.0147914   |
| polydisp (sig/avg)                       | 0.193473    | ± | 0.000581531 |
| SLD sphere ( $\text{\AA}^{-2}$ )         | 2.11e-06    | ± | 0           |
| SLD solvent ( $\text{\AA}^{-2}$ )        | 6.3e-06     | ± | 0           |
| bkg (cm <sup>-1</sup> sr <sup>-1</sup> ) | 0.000803747 | ± | 7.59234e-05 |

chisq = 751.6

Npnts = 182

Sqrt( $X^2/N$ ) = 2.03216

Fitted range = [6,187] =  $0.01404 < Q < 0.4578$

**NOTE:** The SANS data for RsC<sub>1</sub> in D<sub>2</sub>O with d6-acetone (SLD  $6.3 \times 10^{-6} \text{ \AA}^{-2}$ ) fits to the Schulz sphere model with  $\chi^2 = 2.0$ . The  $\chi^2$  value is low but the polydispersity is a little higher. However, the error bars on the parameters are low.



#### 4) Bimodal Schulz sphere fit results for RsC<sub>1</sub> in D<sub>2</sub>O/d6-acetone solvent

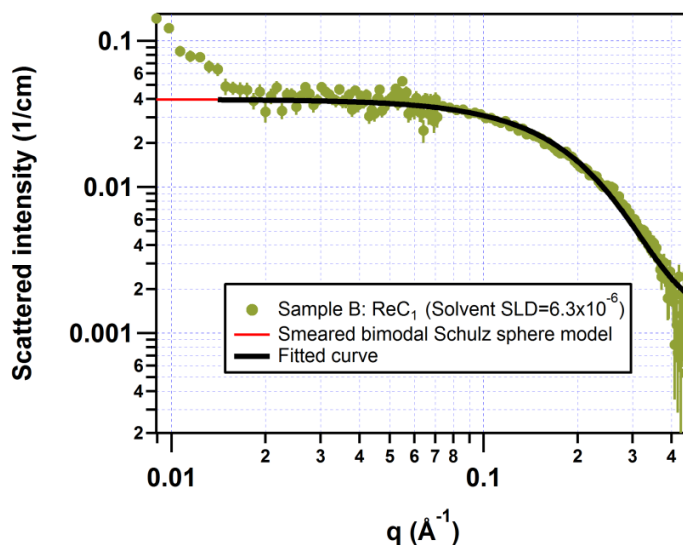

Figure 5. SANS Smeared bimodal Schulz sphere fitting for RsC<sub>1</sub> in a solvent with SLD of  $6.3 \times 10^{-6} \text{ \AA}^{-2}$

|                                                 |            |   |             |
|-------------------------------------------------|------------|---|-------------|
| volume fraction(1)                              | 0.00317392 | ± | 0.00017386  |
| Radius (1) (Å)                                  | 7.16258    | ± | 0.028233    |
| polydispersity(1)                               | 0.2        | ± | 0.000772398 |
| SLD(1) (Å <sup>-2</sup> )                       | 2.11e-06   | ± | 0           |
| volume fraction(2)                              | 0.00211357 | ± | 7.91294e-05 |
| Radius (2)                                      | 10.2       | ± | 0.0564399   |
| polydispersity(2)                               | 0.2        | ± | 0.00203875  |
| SLD(2)                                          | 2.11e-06   | ± | 0           |
| SLD (solvent)                                   | 6.3e-06    | ± | 0           |
| background (cm <sup>-1</sup> sr <sup>-1</sup> ) | 0.00123961 | ± | 0.000121532 |

chisq = 438.747

Npnts = 182

Sqrt( $\chi^2/N$ ) = 1.55264

Fitted range = [6,187] = 0.01404 < Q < 0.4578

**NOTE:** The SANS data for RsC<sub>1</sub> in D<sub>2</sub>O with d6-acetone (SLD  $6.3 \times 10^{-6} \text{ \AA}^{-2}$ ) fits well to the Schulz sphere model with  $\chi^2 = 1.6$ . The  $\chi^2$  value is small with small the error bars on the parameters and give a good representation of the data.

### 5) Bimodal Schulz sphere fit results for RsC<sub>1</sub> in D<sub>2</sub>O/d6-acetone/h6-acetone solvent

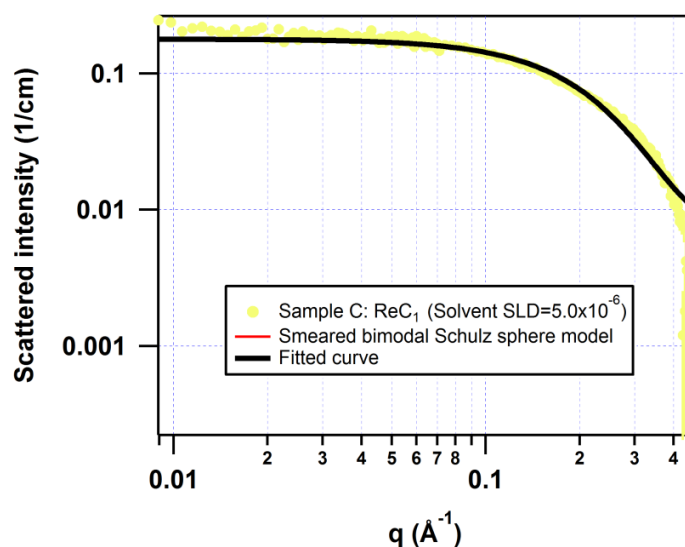

Figure 6. SANS Smeared bimodal Schulz sphere fitting for RsC<sub>1</sub> in a solvent with SLD of  $5.0 \times 10^{-6} \text{ \AA}^{-2}$

|                                                 |            |   |             |
|-------------------------------------------------|------------|---|-------------|
| volume fraction(1)                              | 0.0169962  | ± | 0.000325926 |
| Radius (1) (Å)                                  | 9.9855     | ± | 0.00535286  |
| polydispersity(1)                               | 0.192959   | ± | 7.65902e-05 |
| SLD(1) (Å <sup>-2</sup> )                       | 2.11e-06   | ± | 0           |
| volume fraction(2)                              | 0.0438748  | ± | 0.000867433 |
| Radius (2)                                      | 6.99957    | ± | 0.00610695  |
| polydispersity(2)                               | 0.198993   | ± | 0.000135316 |
| SLD(2)                                          | 2.11e-06   | ± | 0           |
| SLD (solvent)                                   | 5e-06      | ± | 0           |
| background (cm <sup>-1</sup> sr <sup>-1</sup> ) | 0.00719799 | ± | 0.000305478 |

chisq = 1516.38

Npnts = 188      Sqrt( $\chi^2/N$ ) = 2.84004

Fitted range = [0,187] =  $0.008936 < Q < 0.4578$

**NOTE:** The SANS data for RsC<sub>1</sub> for D<sub>2</sub>O withd6/ h6-acetone (SLD  $5.0 \times 10^{-6} \text{ \AA}^{-2}$ ) fits well to the bimodal Schulz sphere model with  $\chi^2 = 2.8$ . The  $\chi^2$  value is fine with small error bars on the parameters and gives a reasonable representation of the data.

6) Schulz sphere fit results for  $\text{RsC}_1$  in  $\text{D}_2\text{O}/\text{d}_6\text{-acetone}/\text{h}_6\text{-acetone}$  solvent

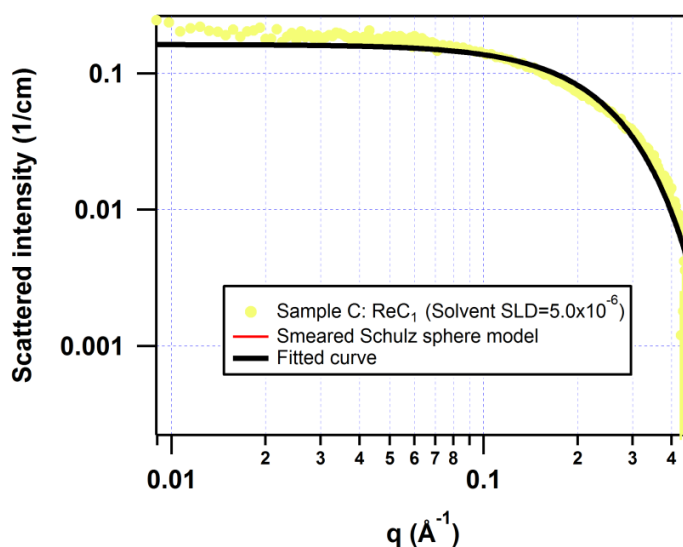

Figure 7. SANS Smeared Schulz sphere fitting for  $\text{RsC}_1$  in a solvent with SLD of  $5.0 \times 10^{-6} \text{ \AA}^{-2}$

|                                          |              |   |             |
|------------------------------------------|--------------|---|-------------|
| Volume Fraction (scale)                  | 0.0762006    | ± | 0.000205149 |
| mean radius (Å)                          | 7.3307       | ± | 0.00227844  |
| polydisp (sig/avg)                       | 0.200824     | ± | 0.000120436 |
| SLD sphere (Å <sup>-2</sup> )            | 2.11e-06     | ± | 0           |
| SLD solvent (Å <sup>-2</sup> )           | 5e-06        | ± | 0           |
| bkg (cm <sup>-1</sup> sr <sup>-1</sup> ) | -0.000389152 | ± | 0.000196865 |

chisq = 3429.76

Npnts = 188      Sqrt( $\chi^2/N$ ) = 4.27123

Fitted range = [0,187] =  $0.008936 < Q < 0.4578$

**NOTE:** The SANS data for  $\text{RsC}_1$  for  $\text{D}_2\text{O}$  with  $\text{d}_6/\text{h}_6\text{-acetone}$  (SLD  $5.0 \times 10^{-6} \text{ \AA}^{-2}$ ) fits to the Schulz sphere model with  $\chi^2 = 4.3$ . The  $\chi^2$  value is higher than the bimodal Schulz sphere fit. Therefore, the bimodal fit gives a better representation of the data.

### 7) Schulz sphere fit results for D<sub>2</sub>O/h6-acetone solvent

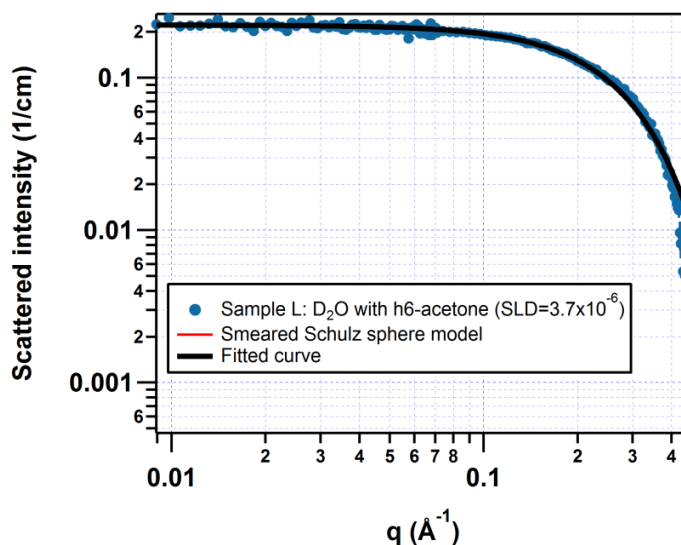

Figure 8. SANS Smearred Schulz sphere fitting for solvent with SLD of  $3.7 \times 10^{-6} \text{ \AA}^{-2}$

|                                          |             |   |             |
|------------------------------------------|-------------|---|-------------|
| Volume Fraction (scale)                  | 0.514398    | ± | 0.0011891   |
| mean radius (Å)                          | 6.4098      | ± | 0.00119736  |
| polydisp (sig/avg)                       | 0.201238    | ± | 3.60556e-05 |
| SLD sphere (Å <sup>-2</sup> )            | 2.11e-06    | ± | 0           |
| SLD solvent (Å <sup>-2</sup> )           | 3.7e-06     | ± | 0           |
| bkg (cm <sup>-1</sup> sr <sup>-1</sup> ) | -0.00192676 | ± | 0.000265317 |

chisq = 826.648

Npnts = 188

Sqrt( $X^2/N$ ) = 2.09692

Fitted range = [0,187] =  $0.008936 < Q < 0.4578$

**NOTE:** The SANS data for D<sub>2</sub>O with h6-acetone (SLD  $3.7 \times 10^{-6} \text{ \AA}^{-2}$ ) fits well to the Schulz sphere model with  $\chi^2 = 2.1$ . The  $\chi^2$  value is fine with small error bars on the parameters and gives a reasonable representation of the data.

### 8) Schulz sphere fit results for D<sub>2</sub>O/d6-acetone solvent

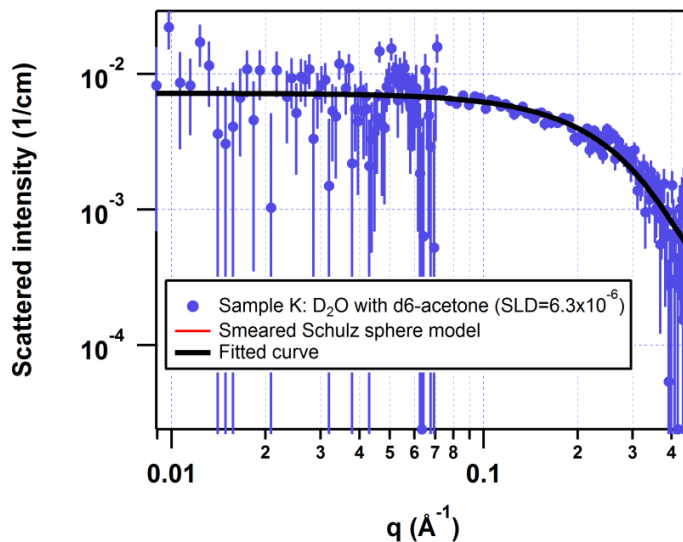

Figure 9. SANS Smeared Schulz sphere fitting for solvent with SLD of  $6.3 \times 10^{-6} \text{ \AA}^{-2}$

|                                          |             |   |             |
|------------------------------------------|-------------|---|-------------|
| Volume Fraction (scale)                  | 0.00179017  | ± | 3.81739e-05 |
| mean radius (Å)                          | 6.98313     | ± | 0.0150534   |
| polydisp (sig/avg)                       | 0.199408    | ± | 0.000459761 |
| SLD sphere (Å <sup>-2</sup> )            | 2.11e-06    | ± | 0           |
| SLD solvent (Å <sup>-2</sup> )           | 6.3e-06     | ± | 0           |
| bkg (cm <sup>-1</sup> sr <sup>-1</sup> ) | 0.000253573 | ± | 7.0095e-05  |

chisq = 252.689

Npnts = 188

Sqrt( $X^2/N$ ) = 1.15935

Fitted range = [0,187] =  $0.008936 < Q < 0.4578$

**NOTE:** The SANS data for D<sub>2</sub>O with d6-acetone (SLD  $3.7 \times 10^{-6} \text{ \AA}^{-2}$ ) fits well to the Schulz sphere model with  $\chi^2 = 1.2$ . The  $\chi^2$  value is good with small error bars on the parameters and gives a reasonable representation of the data.

### 9) Schulz sphere fit results for D<sub>2</sub>O/d6-acetone/h6-acetone solvent

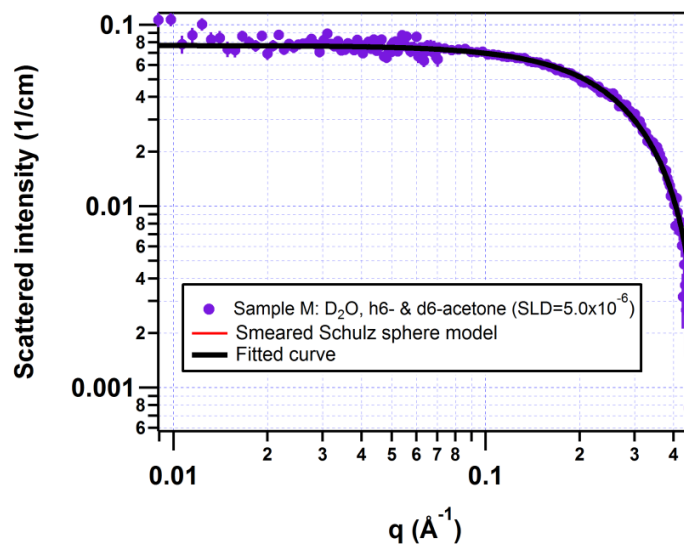

Figure 10. SANS Smearred Schulz sphere fitting for solvent with SLD of  $5.0 \times 10^{-6} \text{ \AA}^{-2}$

|                                          |             |   |             |
|------------------------------------------|-------------|---|-------------|
| Volume Fraction (scale)                  | 0.0985031   | ± | 0.00037264  |
| mean radius (Å)                          | 5.89853     | ± | 0.000611643 |
| polydisp (sig/avg)                       | 0.129994    | ± | 9.86534e-06 |
| SLD sphere (Å <sup>-2</sup> )            | 2.11e-06    | ± | 0           |
| SLD solvent (Å <sup>-2</sup> )           | 5e-06       | ± | 0           |
| bkg (cm <sup>-1</sup> sr <sup>-1</sup> ) | -0.00895711 | ± | 0.000198135 |

chisq = 375.4

Npnts = 188

Sqrt( $X^2/N$ ) = 1.41308

Fitted range = [0,187] =  $0.008936 < Q < 0.4578$

**NOTE:** The SANS data for D<sub>2</sub>O with d6/h6-acetone (SLD  $5.0 \times 10^{-6} \text{ \AA}^{-2}$ ) fits well to the Schulz sphere model with  $\chi^2 = 1.40$ . The  $\chi^2$  value is good with small error bars on the parameters and gives a reasonable representation of the data.

### 10) Bimodal Schulz sphere fit results for insulin in D<sub>2</sub>O/d6-acetone solvent

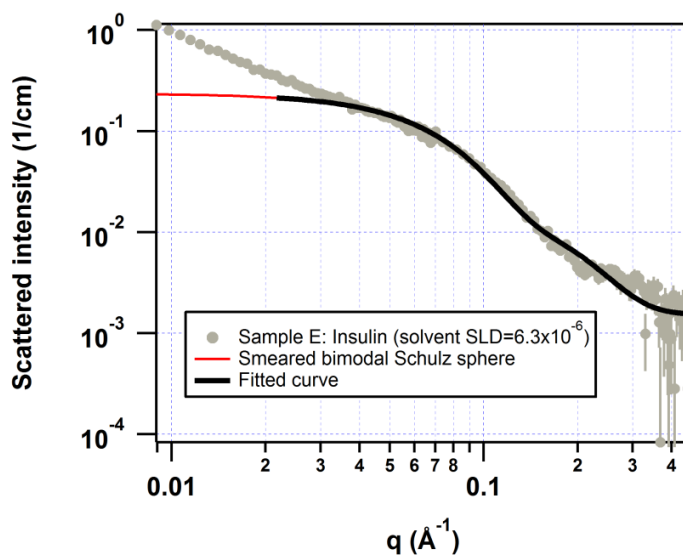

Figure 11. SANS Smearred bimodal Schulz sphere fitting for insulin in a solvent with SLD of  $6.3 \times 10^{-6} \text{ \AA}^{-2}$

|                                                 |             |   |             |
|-------------------------------------------------|-------------|---|-------------|
| volume fraction(1)                              | 0.000800676 | ± | 6.31943e-05 |
| Radius (1) (Å)                                  | 10.6801±    |   | 0.909249    |
| polydispersity(1)                               | 0.2         | ± | 0.0477876   |
| SLD(1) (Å <sup>-2</sup> )                       | 1.54e-06    | ± | 0           |
| volume fraction(2)                              | 0.000897045 | ± | 4.43761e-05 |
| Radius (2)                                      | 25.0012±    |   | 0.928568    |
| polydispersity(2)                               | 0.200078    | ± | 0.0193765   |
| SLD(2)                                          | 1.54e-06    | ± | 0           |
| SLD (solvent)                                   | 6.3e-06 ±   |   | 0           |
| background (cm <sup>-1</sup> sr <sup>-1</sup> ) | 0.00165025  | ± | 0.000126041 |

chisq = 1519.05

Npnts = 169                      Sqrt( $\chi^2/N$ ) = 2.99808

Fitted range = [19,187] = 0.0251 < Q < 0.4578

**NOTE:** The SANS data for insulin in D<sub>2</sub>O with d6-acetone (SLD  $6.3 \times 10^{-6} \text{ \AA}^{-2}$ ) fits well to the bimodal Schulz sphere model with  $\chi^2 = 3.0$ . The  $\chi^2$  value is fine with small error bars on the parameters and gives a reasonable representation of the data.

### 11) Bimodal Schulz sphere fit results for insulin in D<sub>2</sub>O/d<sub>6</sub>-acetone/h<sub>6</sub>-acetone solvent

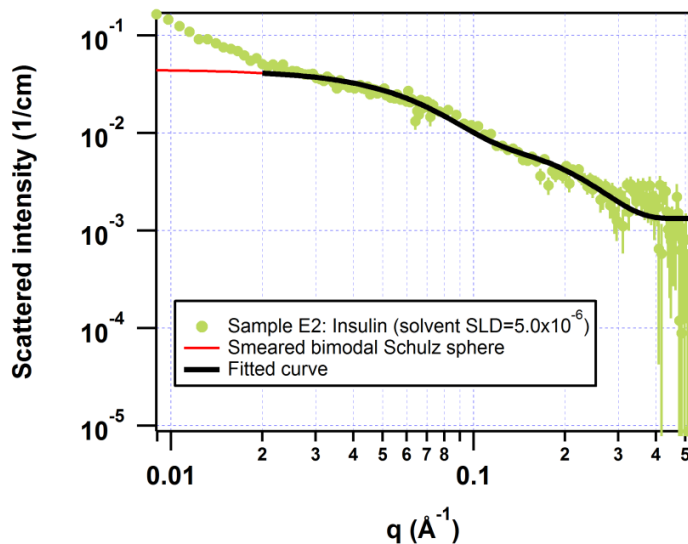

Figure 12. SANS Smeared bimodal Schulz sphere fitting for insulin in a solvent with SLD of  $5.0 \times 10^{-6} \text{ \AA}^{-2}$

|                                                 |             |   |             |
|-------------------------------------------------|-------------|---|-------------|
| volume fraction(1)                              | 0.00126557  | ± | 7.71984e-05 |
| Radius (1) (Å)                                  | 10.1235±    |   | 0.176015    |
| polydispersity(1)                               | 0.113143    | ± | 0.0018584   |
| SLD(1) (Å <sup>-2</sup> )                       | 1.54e-06    | ± | 0           |
| volume fraction(2)                              | 0.000208089 | ± | 2.35004e-05 |
| Radius (2)                                      | 28.0404±    |   | 3.51929     |
| polydispersity(2)                               | 0.2         | ± | 0.0724347   |
| SLD(2)                                          | 1.54e-06    | ± | 0           |
| SLD (solvent)                                   | 5e-06       | ± | 0           |
| background (cm <sup>-1</sup> sr <sup>-1</sup> ) | 0.00129761  | ± | 8.77663e-05 |

chisq = 356.65

Npnts = 162

Sqrt( $\chi^2/N$ ) = 1.48376

Fitted range = [13,174] =  $0.019997 < Q < 0.51793$

**NOTE:** The SANS data for insulin in D<sub>2</sub>O with d<sub>6</sub>-acetone/h<sub>6</sub>-acetone (SLD  $5.0 \times 10^{-6} \text{ \AA}^{-2}$ ) fits well to the bimodal Schulz sphere model with  $\chi^2 = 1.5$ . The  $\chi^2$  value is fine with small error bars on the parameters and gives a reasonable representation of the data. The radius value of  $28.0 \text{ \AA} \pm 3 \text{ \AA}$  agrees well with 25 Å species of pure deuterated insulin sample E.



## 12) Bimodal Schulz sphere fit results for insulin in D<sub>2</sub>O/h6-acetone solvent

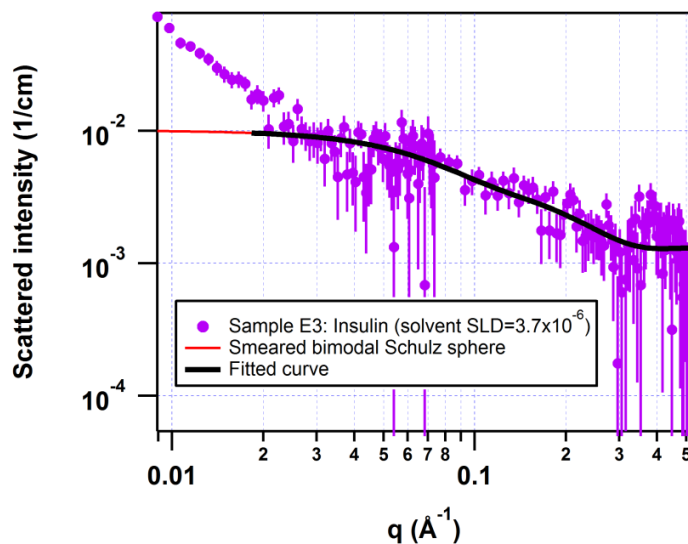

Figure 13. SANS Smeared bimodal Schulz sphere fitting for insulin in a solvent with SLD of  $3.7 \times 10^{-6} \text{ \AA}^{-2}$

|                                                 |             |   |             |
|-------------------------------------------------|-------------|---|-------------|
| volume fraction(1)                              | 0.00123037  | ± | 0.00024338  |
| Radius (1) (Å)                                  | 10.9502±    |   | 0.0201098   |
| polydispersity(1)                               | 0.0593514   | ± | 7.99332e-05 |
| SLD(1) (Å <sup>-2</sup> )                       | 1.54e-06    | ± | 0           |
| volume fraction(2)                              | 0.000246417 | ± | 5.81943e-05 |
| Radius (2)                                      | 24.9505±    |   | 2.01593     |
| polydispersity(2)                               | 0.190133    | ± | 0.00747531  |
| SLD(2)                                          | 1.54e-06    | ± | 0           |
| SLD (solvent)                                   | 3.37e-06    | ± | 0           |
| background (cm <sup>-1</sup> sr <sup>-1</sup> ) | 0.00137975  | ± | 0.000100033 |

chisq = 832.729

Npnts = 175

Sqrt(X<sup>2</sup>/N) = 2.18139

Fitted range = [0,174] = 0.0089374 < Q < 0.51793

**NOTE:** The SANS data for insulin in D<sub>2</sub>O with d6-acetone (SLD  $3.7 \times 10^{-6} \text{ \AA}^{-2}$ ) fits well to the bimodal Schulz sphere model with  $\chi^2 = 2.2$ . The  $\chi^2$  value is fine with small error bars on the parameters and gives a reasonable representation of the data. The radius value of  $24.9 \text{ \AA} \pm 2 \text{ \AA}$  agrees well with  $25 \text{ \AA}$  species of pure deuterated insulin sample E.

### 13) Bimodal Schulz sphere fit results for RsC<sub>1</sub> with insulin in D<sub>2</sub>O/h6-acetone solvent

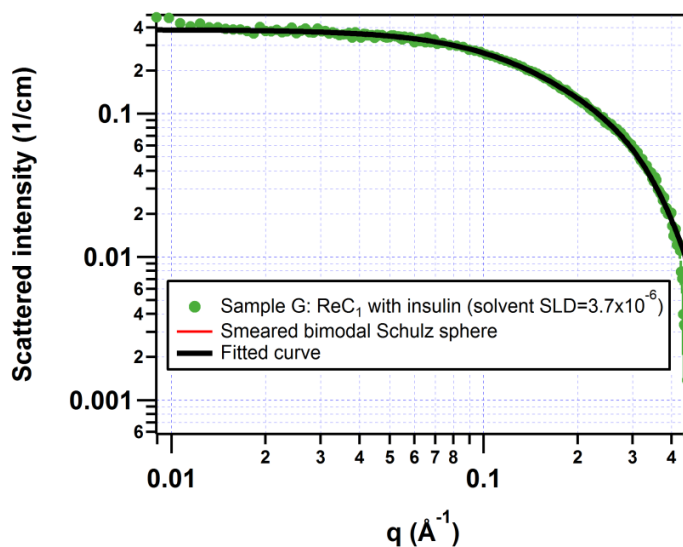

Figure 14. SANS Smearred bimodal Schulz sphere fitting for RsC<sub>1</sub> with insulin in a solvent with SLD of  $3.7 \times 10^{-6} \text{ \AA}^{-2}$

|                                                 |              |   |             |
|-------------------------------------------------|--------------|---|-------------|
| volume fraction(1)                              | 0.410847     | ± | 0.00191969  |
| Radius (1) (Å)                                  | 7.0008       | ± | 0.00126996  |
| polydispersity(1)                               | 0.199932     | ± | 3.13124e-05 |
| SLD(1) (Å <sup>-2</sup> )                       | 2.11e-06     | ± | 0           |
| volume fraction(2)                              | 0.0201735    | ± | 0.000400964 |
| Radius (2)                                      | 16.2904±     |   | 0.114009    |
| polydispersity(2)                               | 0.198779     | ± | 0.00129361  |
| SLD(2)                                          | 2.03e-06     | ± | 0           |
| SLD (solvent)                                   | 3.7e-06 ±    |   | 0           |
| background (cm <sup>-1</sup> sr <sup>-1</sup> ) | -0.000627838 | ± | 0.000297076 |

chisq = 491.705

Npnts = 188

Sqrt( $\chi^2/N$ ) = 1.61724

Fitted range = [0,187] =  $0.008936 < Q < 0.4578$

**NOTE:** The SANS data for insulin+octameric RsC<sub>1</sub> in D<sub>2</sub>O with h6-acetone (SLD  $3.7 \times 10^{-6} \text{ \AA}^{-2}$ ) fits well to the bimodal Schulz sphere model with  $\chi^2 = 1.6$ . The  $\chi^2$  value is good with small error bars on the parameters and gives a reasonable representation of the data.

#### 14) Bimodal Schulz sphere fit results for RsC<sub>1</sub> with insulin in D<sub>2</sub>O/d6-acetone solvent

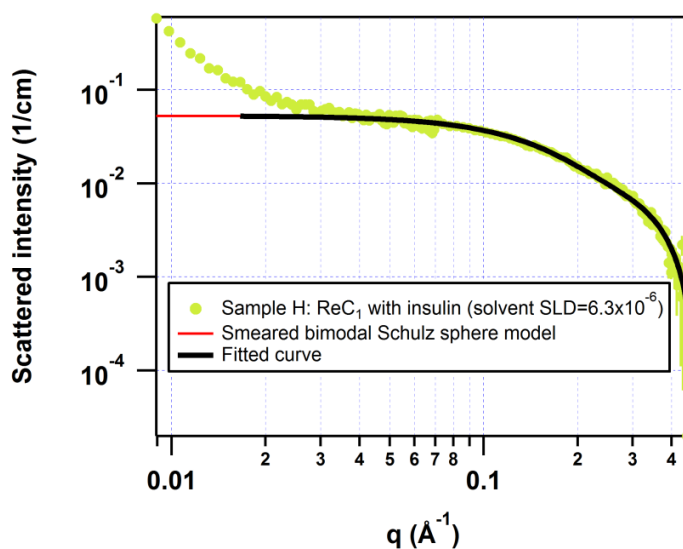

Figure 15. SANS Smeared bimodal Schulz sphere fitting for RsC<sub>1</sub> with insulin in a solvent with SLD of  $6.3 \times 10^{-6} \text{ \AA}^{-2}$

|                                                 |             |   |             |
|-------------------------------------------------|-------------|---|-------------|
| volume fraction(1)                              | 0.00831521  | ± | 9.80527e-05 |
| Radius (1) (Å)                                  | 6.84996±    |   | 0.00698206  |
| polydispersity(1)                               | 0.101857    | ± | 0.000117753 |
| SLD(1) (Å <sup>-2</sup> )                       | 2.11e-06    | ± | 0           |
| volume fraction(2)                              | 0.000959888 | ± | 9.73064e-06 |
| Radius (2)                                      | 16.3505±    |   | 0.0169858   |
| polydispersity(2)                               | 0.0098698   | ± | 6.49497e-06 |
| SLD(2)                                          | 2.03e-06    | ± | 0           |
| SLD (solvent)                                   | 6.3e-06 ±   |   | 0           |
| background (cm <sup>-1</sup> sr <sup>-1</sup> ) | -0.00150767 | ± | 0.000107212 |

chisq = 629.482

Npnts = 175

Sqrt(X<sup>2</sup>/N) = 1.89659

Fitted range = [13,187] = 0.02 < Q < 0.4578

**NOTE:** The SANS data for insulin + octameric RsC<sub>1</sub> for D<sub>2</sub>O with d6-acetone (SLD  $6.3 \times 10^{-6} \text{ \AA}^{-2}$ ) fits well to the bimodal Schulz sphere model with  $\chi^2 = 1.9$ . The  $\chi^2$  value is good with small error bars on the parameters and gives a reasonable representation of the data.

15) Bimodal Schulz sphere fit results for RsC<sub>1</sub> with insulin in D<sub>2</sub>O/h6-acetone/d6-acetone solvent

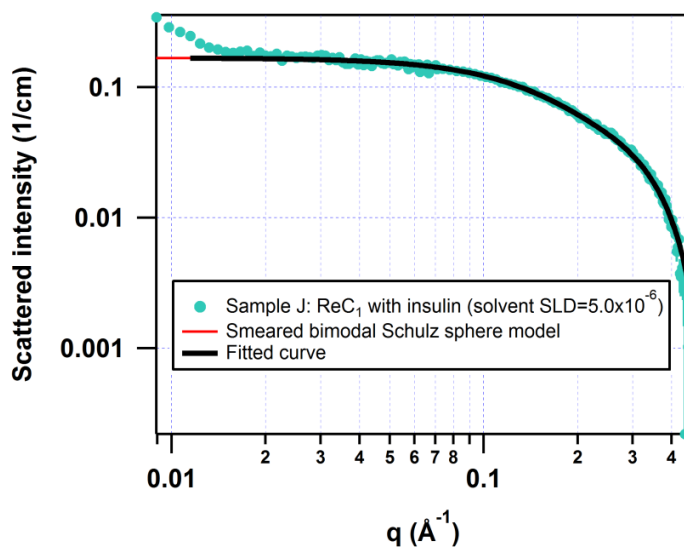

Figure 16. SANS Smeared bimodal Schulz sphere fitting for RsC<sub>1</sub> with insulin in a solvent with SLD of  $5.0 \times 10^{-6} \text{ \AA}^{-2}$

|                                                 |             |   |             |
|-------------------------------------------------|-------------|---|-------------|
| volume fraction(1)                              | 0.071979    | ± | 0.000441769 |
| Radius (1) (Å)                                  | 6.99879±    |   | 0.000449895 |
| polydispersity(1)                               | 0.100019    | ± | 4.4619e-06  |
| SLD(1) (Å <sup>-2</sup> )                       | 2.11e-06    | ± | 0           |
| volume fraction(2)                              | 0.00400791  | ± | 6.18437e-05 |
| Radius (2)                                      | 16.4673±    |   | 0.0713023   |
| polydispersity(2)                               | 0.10205±    |   | 0.000454781 |
| SLD(2)                                          | 2.03e-06    | ± | 0           |
| SLD (solvent)                                   | 5e-06       | ± | 0           |
| background (cm <sup>-1</sup> sr <sup>-1</sup> ) | -0.00401367 | ± | 0.000227834 |

chisq = 380.063

Npnts = 185

Sqrt( $\chi^2/N$ ) = 1.43332

Fitted range = [3,187] =  $0.01149 < Q < 0.4578$

**NOTE:** The SANS data for insulin + octameric RsC<sub>1</sub> in D<sub>2</sub>O withd6/ h6-acetone (SLD  $5.0 \times 10^{-6} \text{ \AA}^{-2}$ ) fits well to the bimodal Schulz sphere model with  $\chi^2 = 1.4$ . The  $\chi^2$  value is good with small error bars on the parameters and gives a reasonable representation of the data.
